# Supplementary material for: Quantification of intraskeletal histovariability in Alligator mississippiensis and implications for vertebrate osteohistology
Source: PeerJ. 2014 Jun 3;2:e422. doi: 10.7717/peerj.422 (PMC4060058; doi:10.7717/peerj.422)
Supplement: Table S1 [file peerj-02-422-s002.xlsx]

## Sheet: S1
Table S1. MorphoBank P731 accession numbers for high-resolution images of Alligator skeletal elements and manuscript figures. MOR: Museum of the Rockies, Montana, USA.
Element	Specimen Number	MOR Histology Project Code	MorphoBank Accession Numbers
Left Coracoid	MOR-OST 1648	2007-05RC3 Cor3L	M323402
	MOR-OST 1649	2007-05RC4 Cor4L	M323417
Right Coracoid	MOR-OST 1647	1998-04R Cor-2	M323381
	MOR-OST 1648	2007-05RC3 Cor3R	M323395
	MOR-OST 1649	2007-05RC4 Cor4R	M323421
	MOR-OST 1650	2007-05RC5 Cor5R	M323436
Left Fibula	MOR-OST 1647	1998-04R TF-7	M323384
	MOR-OST 1648	2007-05RC3 F3L	M323386
	MOR-OST 1649	2007-05RC4 F4L	M323422
	MOR-OST 1650	2007-05RC5 F5L	M323423
Right Fibula	MOR-OST 1648	2007-05RC3 F3R	M323399
	MOR-OST 1649	2007-05RC4 F4R	M323412
	MOR-OST 1650	2007-05RC5 F5R	M323431
Left Femur	MOR-OST 1648	2007-05RC3 Fe3L	M323389
	MOR-OST 1649	2007-05RC4 Fe4L	M323411
	MOR-OST 1650	2007-05RC5 Fe5L	M323429
Right Femur	MOR-OST 1647	1998-04R Fe-7	M323382
	MOR-OST 1648	2007-05RC3 Fe3R	M323396
	MOR-OST 1649	2007-05RC4 Fe4R	M323410; M323418
	MOR-OST 1650	2007-05RC5 Fe5R	M323430
Left Humerus	MOR-OST 1647	1998-04R H-8	M323377
	MOR-OST 1648	2007-05RC3 H3L	M323387
	MOR-OST 1649	2007-05RC4 H4L	M323405
	MOR-OST 1650	2007-05RC5 H5L	M323424
Right Humerus	MOR-OST 1648	2007-05RC3 H3R	M323400
	MOR-OST 1649	2007-05RC4 H4R	M323413
	MOR-OST 1650	2007-05RC4 H5R	M323432
Left Radius	MOR-OST 1647	1998-04R RU-5	M323378
	MOR-OST 1648	2007-05RC3 R3L	M323388
	MOR-OST 1649	2007-05RC4 R4L	M323406
	MOR-OST 1650	2007-05RC5 R5L	M323428
Right Radius	MOR-OST 1648	2007-05RC3 R3R	M323401
	MOR-OST 1650	2007-05RC5 R5R	M323433
Left Scapula	MOR-OST 1648	2007-05RC3 Sc3L	M323393
	MOR-OST 1649	2007-05RC4 Sc4L	M323407
Right Scapula	MOR-OST 1647	1998-04R S-2	M323383
	MOR-OST 1648	2007-05RC3 Sc3R	M323398
	MOR-OST 1649	2007-05RC4 Sc4R	M323414
	MOR-OST 1650	2007-05RC5 Sc5R	M323434
Left Tibia	MOR-OST 1647	1998-04R TF-7	M323379
	MOR-OST 1648	2007-05RC3 T3L	M323390
	MOR-OST 1649	2007-05RC4 T4L	M323408
	MOR-OST 1650	2007-05RC5 T5L	M323425
Right Tibia	MOR-OST 1648	2007-05RC3 T3R	M323403
	MOR-OST 1649	2007-05RC4 T4R	M323415
	MOR-OST 1650	2007-05RC5 T5R	M323439
Left Ulna	MOR-OST 1647	1998-04R RU-5	M323380
	MOR-OST 1648	2007-05RC3 U3L	M323391
	MOR-OST 1649	2007-05RC4 U4L	M323409
	MOR-OST 1650	2007-05RC5 U5L	M323426
Right Ulna	MOR-OST 1648	2007-05RC3 U3R	M323404
	MOR-OST 1649	2007-05RC4 U4R	M323416
	MOR-OST 1650	2007-05RC5 U5R	M323437
Osteoderm	MOR-OST 1648	2007-05RC3 Scute3A	M323397
	MOR-OST 1648	2007-05RC3 Scute3B	M323394
	MOR-OST 1649	2007-05RC4 Scute4A	M323419
	MOR-OST 1649	2007-05RC4 Scute4B	M323420
	MOR-OST 1650	2007-05RC5 Scute5A	M323427
	MOR-OST 1650	2007-05RC5 Scute5B	M323435
Figure	Figure 1		M331603
	Figure 2		M331604
	Figure 3		M331605
	Figure 4		M331606
	Figure 5		M323468
	Figure 6		M323469
	Figure 7		M323470
	Figure 8		M323471
	Figure 9		M323614
	Figure 10		M323467
	Figure S1		M323447
	Figure S2		M323456
	Figure S3		M323465
	Figure S4		M323448
	Figure S5		M323457
	Figure S6		M323466
	Figure S7		M323440
	Figure S8		M323449
	Figure S9		M323458
	Figure S10		M323441
	Figure S11		M323450
	Figure S12		M323459
	Figure S13		M323442
	Figure S14		M323451
	Figure S15		M323460
	Figure S16		M323443
	Figure S17		M323452
	Figure S18		M323461
	Figure S19		M323444
	Figure S20		M323453
	Figure S21		M323462
	Figure S22		M323445
	Figure S23		M323454
	Figure S24		M323463
	Figure S25		M323446
	Figure S26		M323455
	Figure S27		M323464
